# Supplementary material
Source: publisher figshare collection journal article supplement (https://tandf.figshare.com/articles/dataset/_/6396296)
Supplement: Supplementary file 1 [file 1]

```

## Copyright 2017, David L. Gold
## Permission is hereby granted, for free, to any person that obtains this R code,
## without limitation the rights to use subject to the following conditions:
## 1. The above copyright notice shall be included in all copies of this code.
## 2. This code is offered "as is", without warranty of any kind, express or implied.
## In absolutely no event of any kind shall the authors, or any party associated with
## the authors, be liable for any claim, damages or other liability, arising from, or out of
## or in connection with the use of this code.

#####
## Non-linear growth function of time (t)
mu = function( t, beta0, betal, theta, a, b){
  beta0+betal*t+theta*plogis(t, a, b)
}

#####
## NLME Model Fitting, with example starting values
library(nlme)
T = . # number of time points
n = . # number of mouse tumors
y = . # n by T array of tumor volume measurements, log transformed
day = . # T vector of days, on which tumor sizes were measured
data = data.frame(y=c(t(y)), t=rep(day[1:T],n),
                  mouse.id=as.factor(rep(1:n,each=T)))
data = groupedData(y~t|mouse.id,data)

nlme(y ~ mu(t,beta0,betal,theta, a, b),
     data = data,
     fixed = list(beta0+betal~1,theta + a + b ~ 1),
     random = beta0+betal+theta + a + b ~ 1|mouse.id,
     start = c(beta0=4,betal=0.18, theta = -3.5, a = 21, b = 4))

#####
## Non-linear Least Squares Model Fitting, with example starting values
T = . # number of time points
y = . # 1 by T array of tumor volume measurements, log transformed
t = . # T vector of time points (days), on which tumor sizes were measured

nls(y ~ mu(t,beta0,betal,theta, a, b),
    algorithm="port",
    data = data,
    lower=c(2,.05,-10,6,1),upper=c(5,.22, 0,30,5),
    start = c(beta0=3.8,betal=0.18,theta=-2,a=18,b = 3))

#####
## Piece-wise Model Fitting
f.pw = function(y, t, T, cp.i1, cp.i2){
  ## inputs:
  ## T = . # number of time points
  ## y = . # 1 by T array of tumor volume measurements, log transformed
  ## t = . # T vector of time points (days), on which tumor sizes were measured
  ## cp.i1 = . # index of change point 1
  ## cp.i2 = . # index of change point 2, > cp.i1

  if(cp.i2>cp.i1){
    index1=1:cp.i1
    index2=(cp.i1+1):cp.i2
    index3=(cp.i2+1):T
    betal = lm(y[index1]~t[index1])$coef
    y. = y[index2] - betal[1]-betal[2]*t[index2]
    trend = -plogis(t[index2],(t[cp.i1+1]+t[cp.i2])/2,(t[cp.i2+1]-t[cp.i1])/7.33)
    theta = lm(y.~0+trend)$coef
    beta2 = lm(y[index3]~t[index3])$coef
    mu = c(betal[1]+betal[2]*t[index1],betal[1]+betal[2]*t[index2]+theta*trend,
          betal[1]+betal[2]*t[index3])
    sse = t(y-mu)%*(y-mu)
    return(list(betal=betal,theta=theta,beta2=beta2,fitted.logvol=mu,sse=sse))
  }else{
    print("Error, change points are not in increasing order")
  }
}

```
