# Supplementary material
Source: publisher figshare collection journal article supplement (https://tandf.figshare.com/articles/dataset/_/6396296)

**Table S1. Non-Linear Mixed Effects**

| Treatment | Parameter | Est.  | S.E. | 95% C.I.       |
|-----------|-----------|-------|------|----------------|
| Control   | $\beta_0$ | 3.75  | 0.10 | (3.54, 3.96)   |
|           | $\beta_1$ | 0.17  | 0.01 | (0.16, 0.19)   |
| A         | -         | -     | -    | -              |
| B         | -         | -     | -    | -              |
| A+B       | $\beta_0$ | 4.23  | 0.18 | (3.88, 4.59)   |
|           | $\beta_1$ | 0.12  | 0.01 | (0.10, 0.15)   |
|           | $\beta_2$ | -1.37 | 0.61 | (-2.58, -0.16) |
|           | $\theta$  | 16.76 | 0.91 | (14.94, 18.58) |
|           | $\eta$    | 2.38  | 0.35 | (1.69, 3.07)   |

Supplemental Figure S1. Fitted Non-linear Least Squares, Drug B group, sub-figures display the tumor volumes (points) for each non-TF mouse replicate over time (days) treated with drug B, superimposed with fitted values (line) by non-linear least squares.

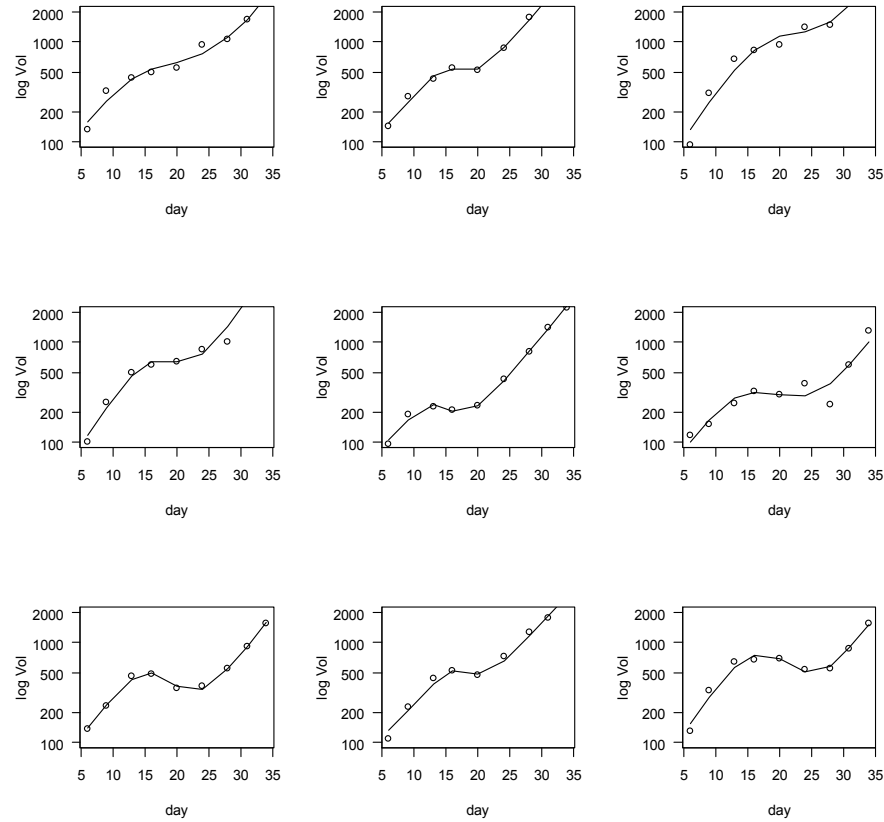

Supplemental Figure S2. Fitted Piece-wise Model, Drug B group , sub-figures display the tumor volumes (points) for each non-TF mouse replicate over time (days) treated with drug B, superimposed with fitted values (line) by piece-wise modeling.

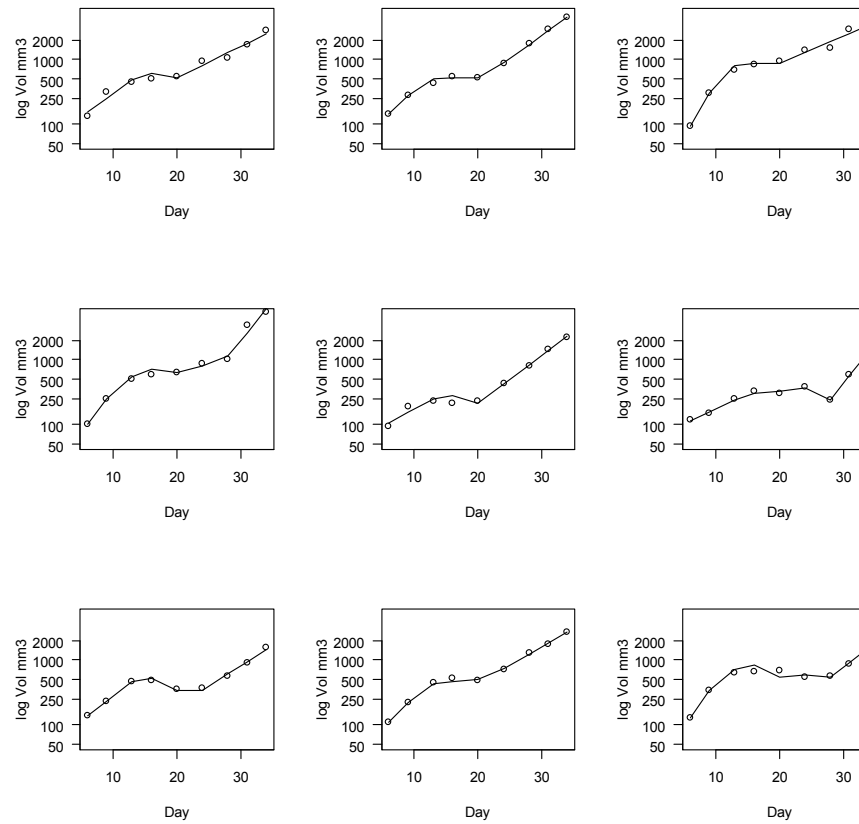

Supplemental Figure S3. Fitted Piece-wise Model, Drug A+B group, sub-figures display the tumor volumes (points) for each non-TF mouse replicate over time (days) treated with drug combination A+B, superimposed with fitted values (line) by piece-wise modeling.

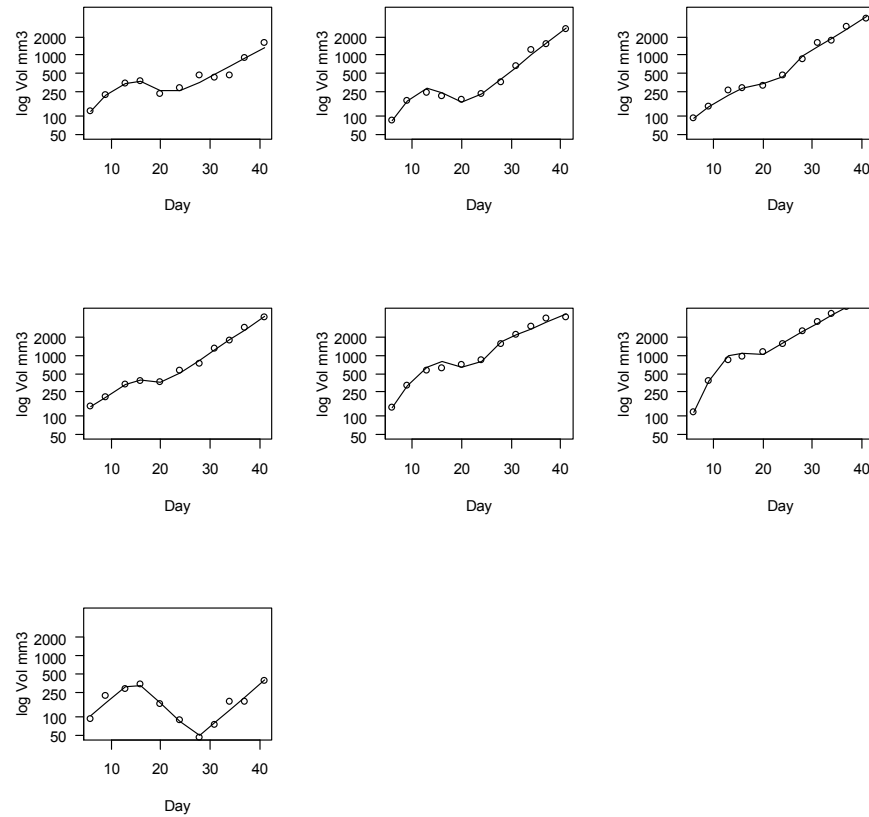

Supplement Figure S4.(a) Shown (light grey) are the pairwise ratios of tumor volumes,  $e^{y_{3jt}-y_{4j't}}$  group B ( $i=3$ ) relative to group A+B ( $i=4$ ), for all possible pairs of tumors  $j, j'$ . Sample mean of the distribution of ratios is shown (dark blue solid), with 10% upper and 10% lower quantiles (dark blue dashed). (b) Repeated as in (a) for the ratios of all possible pairs of tumors within each respective group  $e^{y_{3jt}-y_{3j't}}$  and  $e^{y_{4jt}-y_{4j't}}$  for all  $j \neq j'$ .

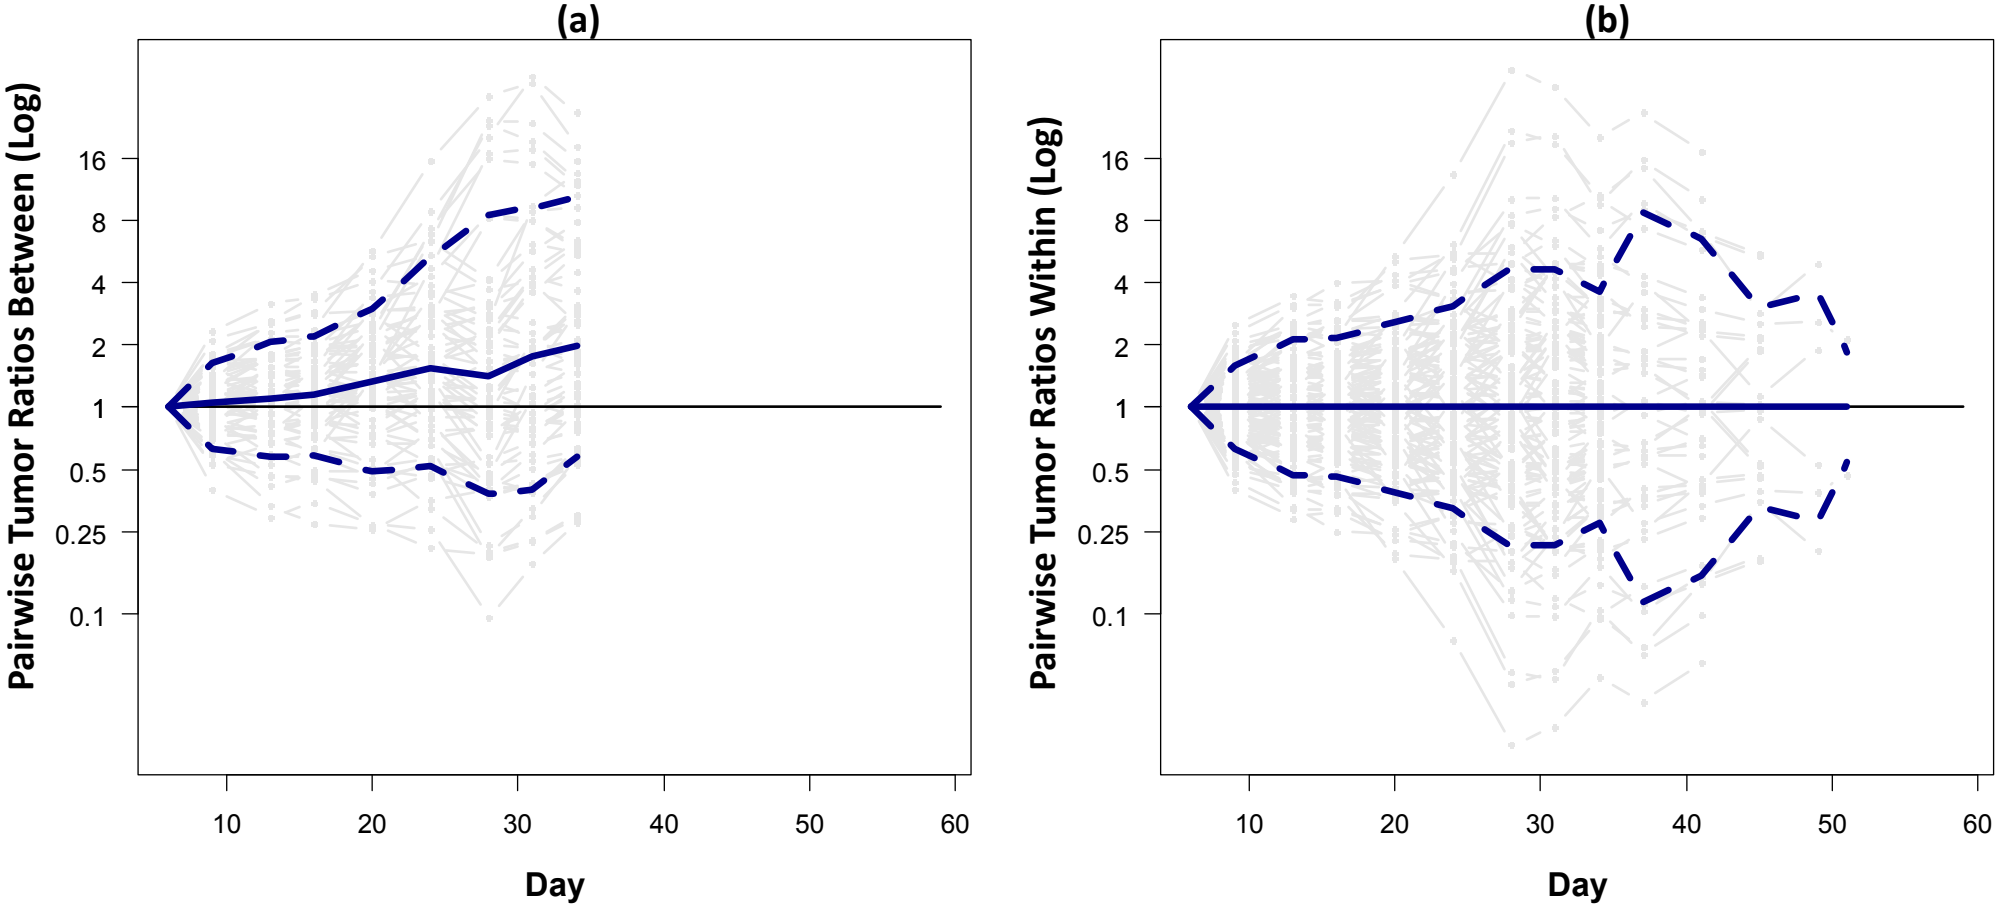

Supplement: Supplementary file 2 [file 1]
